# Supplementary material for: Identification of Centella asiatica's Effective Ingredients for Inducing the Neuronal Differentiation
Source: PubMed Central journal article supplement (PMC4944037; doi:10.1155/2016/9634750), 2016-06-30
Supplement: 9634750.f1.pdf [file 9634750.f1.pdf]

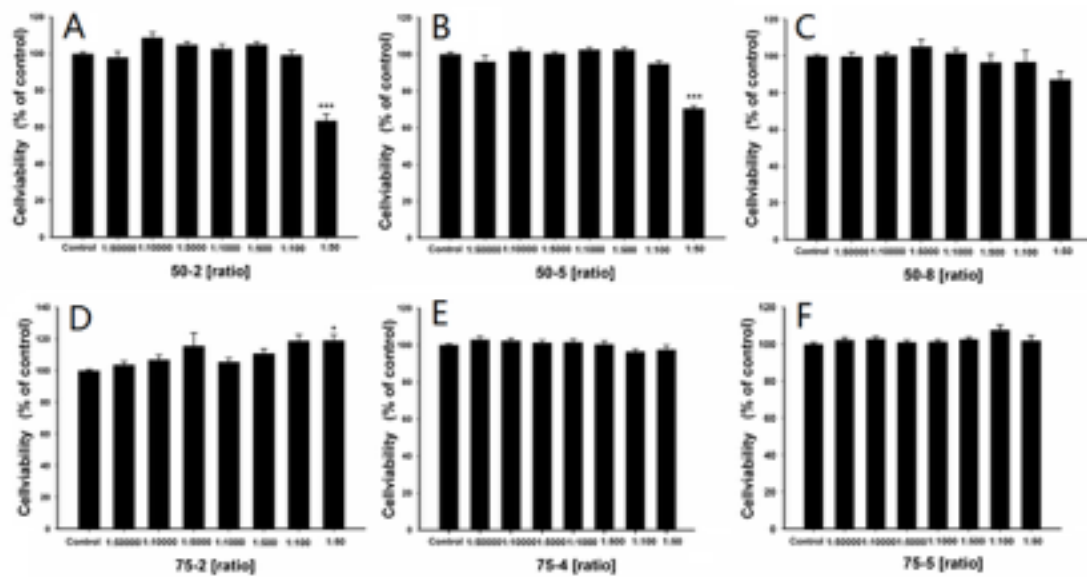

**Supplementary figure: The cytotoxicity of representative fractions in PC12 cells**

PC12 cells were seeded on to 96-well plate and incubated for 24 hours. After that, the cells were treated with 50-2, 50-5, 50-8, 75-2, 75-4, and 75-5 in different concentration for another 72 h. The CCK solution was added to the cell cultures and incubated for 1 hour at 37°C. Absorbance was measured at 450 nm in a microplate reader. Values are expressed as the percentage of total cells against the control, mean  $\pm$  SEM, n = 4, pooled from four independent experiments, (\*) p < 0.05; (\*\*) p < 0.01; (\*\*\*) p < 0.001.
